# Supplementary material for: Divergent transcriptomic responses to repeated and single cold exposures in Drosophila melanogaster
Source: Oxford University Press journal article supplement (doi:10.1242/jeb.059535), 2011-11-09
Supplement: jeb059535-sup-jeb057539tables1-s5.pdf [file jeb059535-sup-jeb057539tables1-s5.pdf]

**Table S1:** Primer pairs used for candidate genes in qRT-PCR validation. Unless otherwise stated, primers were designed *de novo* (as described in the methods).

| Primer           | Direction | Sequence                          | Source               |
|------------------|-----------|-----------------------------------|----------------------|
| <i>Actin79B</i>  | F         | 5'-TTGGAGATCCACATCTGCTG-3'        | Sinclair et al. 2007 |
|                  | R         | 5'-CCAGGTATCGCTGACCGTAT-3'        |                      |
| <i>TotA</i>      | F         | 5'-GCACCCAGGAACTACTTGACATCT-3'    | Ekengren et al.2001  |
|                  | R         | 5'-GACCTCCCTGAATCGGAACTC-3'       |                      |
| <i>TotM</i>      | F         | 5'-CGGACTTGAACACACGCGCC-3'        |                      |
|                  | R         | 5'-CCAGAATCCGCCTTGTGCGGG-3'       |                      |
| <i>Cp16</i>      | F         | 5'-GAAAGTGACTGGTCATCGAG-3'        |                      |
|                  | R         | 5'-AATTAACCAGAGCGTGTGTC-3'        |                      |
| <i>Upheld</i>    | F         | 5'-GAGACAAAACCACCTCAGAC-3'        |                      |
|                  | R         | 5'-GGACGAGAGTCCCAACAC-3'          |                      |
| <i>CG6300</i>    | F         | 5'-TCTCGGGCTGCCTTGGAGGT-3'        |                      |
|                  | R         | 5'-TCCGATCTCATCGGGTCCCAGG-3'      |                      |
| <i>CG33669</i>   | F         | 5'-ACTCCGAAGCGAGAATGAGC-3'        |                      |
|                  | R         | 5'-AACGTCGCCGTGGAGCATGT-3'        |                      |
| <i>Tm2</i>       | F         | 5'-AGTGTGCGTGTGCGTTGGATCT-3'      |                      |
|                  | R         | 5'-CGTTTCAAACACACTATACGCTGTCTG-3' |                      |
| <i>Lsp1 beta</i> | F         | 5'-AGCGCCTGTGCGACGGATTTC-3'       |                      |
|                  | R         | 5'-TCGATGGCCTCGGGTTTGCG-3'        |                      |
| <i>CG14995</i>   | F         | 5'-ATTACGCGCCCTGCCGAACC-3'        |                      |
|                  | R         | 5'-GGCAACTGGGGCGGCTCTTT-3'        |                      |
| <i>CG6188</i>    | F         | 5'-TGACCAGTGAGTTCCGTCTG-3'        |                      |
|                  | R         | 5'-ATGTAGAAGGCGGGGTTCTT-3'        |                      |
| <i>CG13921</i>   | F         | 5'-TGGCTCCATAGCCCATCGCCA-3'       |                      |
|                  | R         | 5'-AGGGTGGCGGGCACAAAGGT-3'        |                      |
| <i>CG16711</i>   | F         | 5'-GGCAGTGGACCACGGTGACG-3'        |                      |
|                  | R         | 5'-GCAGCGGCCGCCATCTGATT-3'        |                      |

**Table S2:** Genes differentially expressed in adult female virgin *D. melanogaster* after repeated cold exposures (five daily 2h exposures to -0.5 °C) but not after prolonged (one 10h exposure to -0.5 °C) or a single short cold exposure (one 2h exposure to -0.5 °C), with a description of associated biological processes or molecular functions, as well as their locations on *D. melanogaster* chromosomes (X, 2L, 2R, 3L, 2R, 4). Genes were classified based on their GO terms that were identified by DAVID. \* indicates differentially expressed genes among the three cold treatments after F-test (ANOVA, p-value < 0.05).

| Functional category                  | Gene Name                   | Fold change | Biological process and molecular function                               | Location |
|--------------------------------------|-----------------------------|-------------|-------------------------------------------------------------------------|----------|
| <b>Muscle protein/ Actin binding</b> | <i>Upheld</i>               | 2.6 up      | Calcium ion binding; sarcomere organization; myofibril assembly         | X        |
|                                      | <i>Tropomyosin 2*</i>       | 2.4 up      | Actin binding; muscle thin filament tropomyosin                         | 3R       |
|                                      | <i>Paramyosin*</i>          | 2.4 up      | Myofibril assembly; structural constituent of muscle; motor activity    | 3L       |
|                                      | <i>Fhos</i>                 | 2.3 up      | Actin binding                                                           | 3L       |
|                                      | <i>Myosin light chain 2</i> | 2.1 up      | ATPase activity; calcium ion binding; microfilament motor activity      | 3R       |
| <b>Chorion</b>                       | <i>Chorion protein 16*</i>  | 2.7 up      | Structural constituent of chorion; multicellular organismal development | 3L       |
|                                      | <i>Chorion protein 19*</i>  | 2.6 up      | Structural constituent of chorion; multicellular organismal development | 3L       |
|                                      | <i>Chorion protein 38*</i>  | 2.1 up      | Eggshell chorion assembly                                               | X        |
| <b>Metabolic</b>                     | <i>CG6300*</i>              | 2.5 up      | Catalytic activity; long-chain fatty acid transporter activity          | 3R       |

|                                                              |                                               |          |                                                                                                    |                      |
|--------------------------------------------------------------|-----------------------------------------------|----------|----------------------------------------------------------------------------------------------------|----------------------|
| <b>process/<br/>Regulation of<br/>biological<br/>process</b> | <i>ia2*</i>                                   | 2.2 up   | Protein tyrosine phosphatase activity; protein amino acid dephosphorylation                        | 2L                   |
|                                                              | <i>Rab GTPase 9E</i>                          | 2.1 up   | GTPase activity; protein transport; small GTPase mediated signal transduction                      | X                    |
|                                                              | <i>CG3635</i>                                 | 2.1 up   | Triglyceride lipase activity                                                                       | 2L                   |
|                                                              | <i>NADH-ubiquinone oxidoreductase chain 4</i> | 2.1 up   | NADH dehydrogenase (ubiquinone) activity; mitochondrial respiratory chain complex I                | Mitochondrion genome |
|                                                              | <i>CG3894</i>                                 | 2.1 up   | Intracellular signaling pathway                                                                    | 2R                   |
|                                                              | <i>Rab GTPase 9Db</i>                         | 2.0 up   | GTP binding; protein transport; small GTPase mediated signal transduction                          | X                    |
|                                                              | <i>Phosphatidylinositol 3 kinase 59F</i>      | 2.0 down | Phosphoinositide-mediated signaling; dsRNA transport; cellular response to starvation              | 2R                   |
|                                                              | <i>CG32174*</i>                               | 2.1 down | Ubiquinone biosynthetic process                                                                    | 3L                   |
|                                                              | <i>Heat shock protein 22*</i>                 | 2.1 down | Response to heat; determination of adult lifespan; response to oxidative stress; protein refolding | 3L                   |
|                                                              | <i>CG8303*</i>                                | 2.1 down | Catalytic activity                                                                                 | 2R                   |
| <b>Metal ion<br/>binding</b>                                 | <i>CG6188</i>                                 | 2.3 down | Folic acid binding; methionine metabolic process                                                   | 3R                   |
|                                                              | <i>CG13830</i>                                | 2.0 up   | Calcium ion binding                                                                                | 3R                   |
|                                                              | <i>CG14306</i>                                | 2.1 up   | Protein binding; zinc ion binding                                                                  | 3R                   |

|              |                                  |          |                                                                                      |    |
|--------------|----------------------------------|----------|--------------------------------------------------------------------------------------|----|
|              | <i>CG32850</i>                   | 2.2 up   | Zinc ion binding; protein binding                                                    | 4  |
|              | <i>Sirt4</i>                     | 2.1 down | Zinc ion binding; chromatin silencing; NAD binding; protein amino acid deacetylation | X  |
|              | <i>Neu3*</i>                     | 2.1 down | zinc ion binding; proteolysis                                                        | 3R |
| <b>Other</b> | <i>Turandot M*</i>               | 4.9 up   | Encodes a humoral factor                                                             | 2L |
|              | <i>CG33669</i>                   | 2.4 up   | Unknown                                                                              | X  |
|              | <i>Histone H3*</i>               | 2.4 up   | DNA binding; chromatin assembly or disassembly; nucleosome assembly                  | 2L |
|              | <i>CG41495*</i>                  | 2.4 up   | Unknown                                                                              |    |
|              | <i>Stellate protein CG33245*</i> | 2.4 up   | Protein kinase regulator activity; regulation of protein kinase activity             | X  |
|              | <i>CG42287</i>                   | 2.4 up   | Unknown                                                                              | 2R |
|              | <i>CG32821</i>                   | 2.3 up   | Unknown                                                                              | X  |
|              | <i>CG11585</i>                   | 2.3 up   | Unknown                                                                              | X  |
|              | <i>CG41124*</i>                  | 2.2 up   | Unknown                                                                              |    |
|              | <i>CG33223</i>                   | 2.2 up   | Unknown                                                                              | X  |
|              | <i>CG33664*</i>                  | 2.2 up   | Unknown                                                                              | X  |
|              | <i>CG32074</i>                   | 2.2 up   | Unknown                                                                              | 3L |
|              | <i>CG1894*</i>                   | 2.2 up   | Histone acetyltransferase activity; regulation of transcription                      | 3R |
|              | <i>Met75C</i>                    | 2.2 up   | Unknown                                                                              | 3L |

|  |                                                           |          |                                                                                         |    |
|--|-----------------------------------------------------------|----------|-----------------------------------------------------------------------------------------|----|
|  | <i>Z band alternatively spliced PDZ-motif protein 66*</i> | 2.2 up   | Mesoderm development; Z disc                                                            | 3L |
|  | <i>Lcp65Ag1</i>                                           | 2.2 up   | Structural constituent of chitin-based cuticle; larval chitin-based cuticle development | 3L |
|  | <i>CG13055</i>                                            | 2.2 up   | Unknown                                                                                 | 3L |
|  | <i>Sperm-specific dynein intermediate chain 3*</i>        | 2.1 up   | Unknown                                                                                 | X  |
|  | <i>CG12587*</i>                                           | 2.1 up   | Unknown                                                                                 | 3R |
|  | <i>CG13622</i>                                            | 2.1 up   | Unknown                                                                                 | 3R |
|  | <i>CG33667</i>                                            | 2.1 up   | Unknown                                                                                 | X  |
|  | <i>CG18437</i>                                            | 2.1 up   | Unknown                                                                                 | 3L |
|  | <i>Chorion protein a at 7F</i>                            | 2.0 up   | Unknown                                                                                 | X  |
|  | <i>CG3984</i>                                             | 2.0 up   | Unknown                                                                                 | 3R |
|  | <i>CG13704*</i>                                           | 2.0 down | Unknown                                                                                 | 3L |
|  | <i>CG9396</i>                                             | 2.0 down | Unknown                                                                                 | 3R |
|  | <i>CG4025</i>                                             | 2.0 down | Unknown                                                                                 | X  |
|  | <i>CG4749</i>                                             | 2.1 down | Unknown                                                                                 | 2L |
|  | <i>CG5428</i>                                             | 2.1 down | Sulfotransferase activity                                                               | 2R |
|  | <i>CG14104</i>                                            | 2.2 down | Unknown                                                                                 | 3L |

|  |                                                    |          |                                                                                           |    |
|--|----------------------------------------------------|----------|-------------------------------------------------------------------------------------------|----|
|  | <i>CG16711</i>                                     | 2.2 down | Unknown                                                                                   | 3L |
|  | <i>CG13921</i>                                     | 2.3 down | Unknown                                                                                   | 3L |
|  | <i>CG14995</i>                                     | 2.6 down | Autophagic cell death; salivary gland cell autophagic cell death                          | 3L |
|  | <i>Larval serum protein 1 <math>\beta^*</math></i> | 2.9 down | Larval serum protein complex; nutrient reservoir activity;<br>oxygen transporter activity | 2L |

**Table S3:** Gene differentially expressed in adult female virgin *D. melanogaster* after a prolonged (10h) cold exposure but not after repeated (five daily 2h exposures) or a single short (2h) cold exposure, with a description of associated biological processes or molecular functions, as well as their locations on *D. melanogaster* chromosomes (X, 2L, 2R, 3L, 2R, 4). Genes were classified based on their GO terms that were identified by DAVID. \* indicates differentially expressed genes among the three cold treatments after F-test (ANOVA, p-value < 0.05).

| GO terms                 | Gene Name                                        | Fold change | Biological process and molecular function                                                      | Location             |
|--------------------------|--------------------------------------------------|-------------|------------------------------------------------------------------------------------------------|----------------------|
| <b>Immune response</b>   | <i>Immune induced molecule 23*</i>               | 2.7 up      | Toll signaling pathway; antibacterial humoral response; defense response                       | 2R                   |
|                          | <i>Chorion protein b at 7F*</i>                  | 2.5 up      | Unknown                                                                                        | X                    |
|                          | <i>Immune iduced molecule 1*</i>                 | 2.3 up      | Defense response                                                                               | 2R                   |
|                          | <i>Metchnikowin*</i>                             | 2.3 up      | Defense response; antibacterial humoral response; antifungal humoral response                  | 2R                   |
|                          | <i>Peptidoglycan-recognition protein SC1a/b*</i> | 2.2 up      | Peptidoglycan binding; protein binding; defense response; innate immune response               | 2R                   |
| <b>Metabolic process</b> | <i>NADH-ubiquinone oxidoreductase chain 3</i>    | 2.5 up      | NADH dehydrogenase (ubiquinone) activity; mitochondrial electron transport, NADH to ubiquinone | Mitochondrial genome |
|                          | <i>CG9747*</i>                                   | 2.0 up      | acyl-CoA delta11-desaturase activity; lipid metabolic process; oxidation reduction             | 3R                   |
|                          | <i>CG4099</i>                                    | 2.0 up      | Heme binding; oxidation reduction                                                              | 3R                   |
|                          | <i>CG13309*</i>                                  | 2.2 down    | Unknown                                                                                        | 3L                   |
|                          | <i>CG31661*</i>                                  | 2.4 down    | Unknown                                                                                        | 2L                   |
|                          | <i>Target of brain insulin*</i>                  | 2.4 down    | Carbohydrate metabolic process                                                                 | 3R                   |

|                     |                                                   |          |                                                                     |    |
|---------------------|---------------------------------------------------|----------|---------------------------------------------------------------------|----|
|                     | <i>CG9466</i>                                     | 2.4 down | Zinc ion binding; carbohydrate binding;                             | 2L |
|                     | <i>Larval visceral protein L*</i>                 | 2.9 down | Cation binding; carbohydrate metabolic process                      | 2R |
|                     | <i>Neither inactivation nor afterpotential D*</i> | 3.6 down | scavenger receptor activity; phototransduction                      | 2L |
| <b>Reproduction</b> | <i>Odorant-binding protein 19c*</i>               | 4.4 up   | Odorant binding; sensory perception of chemical stimulus; transport | X  |
|                     | <i>Vitelline membrane 32E*</i>                    | 5.1 up   | Vitelline membrane formation in chorion-containing eggshell         | 2L |
|                     | <i>Defective chorion 1*</i>                       | 3.6 up   | Chorion-containing eggshell formation                               | X  |
|                     | <i>Lipid storage droplet-1</i>                    | 2.4 up   | Lipid storage                                                       | 3R |
|                     | <i>CG13887*</i>                                   | 2.4 up   | Intracellular protein transport;                                    | 3L |
|                     | <i>Chorion protein 15*</i>                        | 2.7 down | Structural constituent of chorion; eggshell chorion assembly        | 3L |
| <b>Transport</b>    | <i>CG14309*</i>                                   | 5.9 up   | Unknown                                                             | 3R |
|                     | <i>Follicle cell protein 3C</i>                   | 5.7 up   | Unknown                                                             | X  |
|                     | <i>CG10407*</i>                                   | 4.4 up   | Unknown                                                             | 3R |
| <b>Others</b>       | <i>Glutathione S transferase D2*</i>              | 3.9 up   | Glutathione peroxidase activity                                     | 3R |
|                     | <i>Chorion protein b at 7F*</i>                   | 3.9 up   | Oxidation reduction                                                 | X  |
|                     | <i>Heat shock protein 23*</i>                     | 3.3 up   | Response to hypoxia; response to heat                               | 3L |
|                     | <i>CG15784*</i>                                   | 3.2 up   | Unknown                                                             | X  |
|                     | <i>Vitelline membrane-like*</i>                   | 3.1 up   | Dorsal/ventral axis specification                                   | X  |
|                     | <i>CG15829*</i>                                   | 3.0 up   | acyl-CoA binding; enzyme inhibitor activity                         | 3L |



|  |                                    |        |                                                                                                       |    |
|--|------------------------------------|--------|-------------------------------------------------------------------------------------------------------|----|
|  | <i>CG14834*</i>                    | 2.9 up | Unknown                                                                                               | 3L |
|  | <i>Follicle cell protein 26Ac*</i> | 2.8 up | Unknown                                                                                               | 2L |
|  | <i>CG13997*</i>                    | 2.8 up | Unknown                                                                                               | 2L |
|  | <i>CG31086*</i>                    | 2.7 up | Unknown                                                                                               | 3R |
|  | <i>Frost*</i>                      | 2.6 up | Response to cold                                                                                      | 3R |
|  | <i>Cuticular protein 47Eb</i>      | 2.5 up | Structural constituent of chitin-based cuticle; structural constituent of chitin-based larval cuticle | 2R |
|  | <i>CG13324*</i>                    | 2.5 up | Unknown                                                                                               | 2R |
|  | <i>CG13905</i>                     | 2.4 up | Unknown                                                                                               | 3L |
|  | <i>CG15065*</i>                    | 2.3 up | Unknown                                                                                               | 2R |
|  | <i>CG14187*</i>                    | 2.3 up | Unknown                                                                                               | 3L |
|  | <i>HMG protein Z</i>               | 2.2 up | DNA binding                                                                                           | 2R |
|  | <i>CG13114*</i>                    | 2.1 up | Unknown                                                                                               | 2L |
|  | <i>CG16775</i>                     | 2.1 up | Unknown                                                                                               | 3L |
|  | <i>CG13323*</i>                    | 2.1 up | Unknown                                                                                               | 2R |
|  | <i>Niemann-Pick type C-2e</i>      | 2.1 up | Proteolysis                                                                                           | 3R |
|  | <i>CG10993</i>                     | 2.1 up | Nucleic acid binding; nucleotide binding                                                              | X  |
|  | <i>Yellow-g*</i>                   | 2.0 up | Unknown                                                                                               | 3L |
|  | <i>CG12378*</i>                    | 2.0 up | Unknown                                                                                               | 3R |

|  |                           |          |                   |    |
|--|---------------------------|----------|-------------------|----|
|  | <i>Mucin 12Ea</i>         | 2.0 down | Unknown           | X  |
|  | <i>CG10513</i>            | 2.4 down | Unknown           | 3R |
|  | <i>Metallothionein C*</i> | 3.1 down | Metal ion binding | 3R |

**Table S4:** Genes differentially expressed after single short cold exposure, but not in the flies experienced multiple and sustained cold exposures, with a description of associated biological processes or molecular functions, as well as their locations on *D. melanogaster* chromosomes (X, 2L, 2R, 3L, 2R, 4). Genes were classified based on their GO terms that were identified by DAVID. \* indicates differentially expressed genes among the three cold treatments after F-test (ANOVA, p-value < 0.05).

| Gene Name       | Fold change | Biological process and molecular function                                                  | Location |
|-----------------|-------------|--------------------------------------------------------------------------------------------|----------|
| <i>Raptor</i>   | 2.1 down    | Positive regulation of protein amino acid phosphorylation; response to DNA damage stimulus | X        |
| <i>CG42574*</i> | 2.1 down    | Acid-amino acid ligase activity zinc ion binding; protein modification process             | 3R       |
| <i>RhoGEF3</i>  | 2.2 down    | Signal transducer activity; regulation of Rho protein signal transduction                  | 3L       |
| <i>CG11505*</i> | 2.5 down    | Nucleic acid binding                                                                       | 3L       |
| <i>CG34415</i>  | 2.6 down    | Regulation of transcription; DNA-dependent                                                 | 2R       |

**Table S5:** Pathways identified by KEGG\_PATHWAY from genes differentially expressed six hours after repeated (five daily 2h exposures to -0.5 °C), prolonged (one 10h exposure to -0.5 °C), and single short (one 2h exposure to -0.5 °C) cold exposures by female adult *Drosophila melanogaster*.

| Database | Pathway terms                           | Genes associated with pathway                             |                                                    |                      |
|----------|-----------------------------------------|-----------------------------------------------------------|----------------------------------------------------|----------------------|
|          |                                         | Repeated                                                  | Prolonged                                          | Single short         |
| KEGG     | Lysine degradation                      |                                                           | <i>CG10814</i>                                     | <i>CG10814</i>       |
|          | Lysosome                                | <i>CG9463</i>                                             | <i>CG9463</i><br><i>CG9466</i>                     |                      |
|          | Purine metabolism                       |                                                           | <i>Urate oxidase</i>                               | <i>Urate oxidase</i> |
|          | Glycine                                 | <i>CG6188</i>                                             |                                                    |                      |
|          | Oxidative phosphorylation               | <i>NADH-ubiquinone oxidoreductase chain 4</i>             | <i>NADH-ubiquinone oxidoreductase chain 3</i>      |                      |
|          | p53 pathway                             | <i>CG3187</i><br><i>Phosphatidylinositol 3 kinase 59F</i> |                                                    |                      |
|          | Ras pathway                             | <i>Phosphatidylinositol 3 kinase 59F</i>                  |                                                    | <i>Raptor</i>        |
|          | Galactose metabolism                    |                                                           | <i>CG11909</i><br><i>Larval visceral protein L</i> |                      |
|          | Biosynthesis of unsaturated fatty acids |                                                           | <i>CG9747</i>                                      |                      |
|          | Glutathione metabolism                  |                                                           | <i>Glutathione S transferase D2</i>                |                      |
|          |                                         |                                                           |                                                    |                      |
